## **The impacts of social restrictions during the COVID-19 pandemic on the physical activity levels of over 50-year olds: the CHARIOT COVID-19 Rapid Response (CCRR) cohort study**

Conall Green,<sup>1</sup> Thomas Beaney,<sup>1@</sup> David Salman,<sup>1,2@</sup> Catherine Robb,<sup>3,4</sup> Celeste A. de Jager Loots,<sup>4</sup> Parthenia Giannakopoulou,<sup>4</sup> Chi Udeh-Momoh,<sup>4</sup> Sara Ahmadi-Abhari,<sup>4</sup> Azeem Majeed,<sup>1,5</sup> Lefkos T. Middleton,<sup>4,5</sup> Alison. H. McGregor<sup>2</sup>

### **Author affiliations:**

1: Department of Primary Care and Public Health, Imperial College London, UK, W6 8RP

2: MSk lab, Faculty of Medicine, Imperial College London, UK, W12 0BZ

3: Epidemiology and Preventive Medicine Alfred Hospital; Monash University, Monash University, Melbourne, Australia

4: Ageing Epidemiology Research Unit (AGE), School of Public Health, Faculty of Medicine, Imperial College London, UK

5: Public Health Directorate, Imperial College NHS Healthcare Trust, London, UK

### **@Correspondence to:**

#### **Thomas Beaney**

ORCID ID: 0000-0001-9709-7264

Department of Primary Care and Public Health

Charing Cross Campus, The Reynolds Building, St Dunstan's Road, London, W6 8RP

Email: [thomas.beaney@imperial.ac.uk](mailto:thomas.beaney@imperial.ac.uk)

Phone: +44 (0) 207 5943 368

#### **David Salman**

ORCID ID: 0000-0002-1481-8829

MSk lab, 2nd Floor, Sir Michael Uren Hub, 86 Wood Lane, London, W12 0BZ

Email: [d.salman11@imperial.ac.uk](mailto:d.salman11@imperial.ac.uk)

Phone: +44 (0) 20 7594 2703

Word count: 2887

Abstract: 249

Figures: 3

Tables: 2

References: 50

## **Contributorship and the guarantor**

CG carried out the analysis and wrote the manuscript. DS, TB and CR conceived the study, developed the survey materials, supervised the analysis, and helped draft the manuscript. CAdJL, PG, CU-M and SA-A developed the survey materials, managed the cohort and dataset and contributed to the analysis and writing and editing of the paper. AM, LM and AHM developed the survey materials, supervised and managed the survey collection and analysis, and contributed to the writing and editing of the paper. All authors developed the survey, carried out analysis and contributed to the development and editing of the paper.

## **Transparency declaration**

The lead authors confirm that the submitted manuscript is an honest, accurate and transparent account of the study being reported. No important aspects of the study have been omitted.

## **Ethics approval**

This research was approved by the Imperial College Research and Ethics Committee (ICREC) and Joint Research Compliance Office (22/04/2020; 20IC5942). All participants were required to provide informed consent before taking part in the study. Data collected as a part of this study are anonymized and kept strictly confidential in accordance with the UK General Data Protection Regulations (2016).

## **Data sharing**

This is an ongoing study, but anonymised data can be provided upon request for the purposes of further data analysis, and can be requested from the Data Management Co-ordinator, Parthenia Giannakopoulou: [parthenia.giannakopoulou13@imperial.ac.uk](mailto:parthenia.giannakopoulou13@imperial.ac.uk)

## **Dissemination declaration**

Participants in the CHARIOT cohort are informed by regular newsletter of all publications pertaining to the cohort.

## **Funding statement**

Work towards this article was in part supported by the National Institute for Health Research (NIHR) Applied Research Collaboration Northwest London and Imperial Biomedical Research Centre (BRC). DS and TB are supported by Wellcome / NIHR BRC fellowships. The views expressed in this publication are those of the authors and not necessarily those of the National Institute for Health Research or the Department of Health and Social Care.

Imperial College London is the sponsor for the CCRR study, and has no influence on the direction or content of the work. There was no external financial funding for the study.

### **Acknowledgements**

We are grateful to Lesley Williamson, Monica Munoz-Troncoso, Snehal Pandya and Emily Pickering (CHARIOT register and facilitator team); Mariam Jiwani, Rachel Veeravalli, Islam Saiful, Danielle Rose, Susie Gold, Rachel Nejade and Shehla Shamsuddin (Imperial College London student volunteers); Stefan McGinn-Summers, Neil Beckford, Inthushaa Indrakumar and Kristina Lakey (Departmental administrative staff in AGE); Dinithi Perera (departmental manager); Heather McLellan-Young (project manager); Helen Ward, James McKeand, Geraint Price, Josip Car, Christina Atchison, Nicholas Peters, Aldo Faisal, and Jennifer Quint (investigator team contributing to CCRR survey design, development and improvement).

### **Patient and public involvement:**

Older adult volunteers (60-80 years of age) from various social and cultural backgrounds provided feedback on the survey content. This feedback was incorporated into the survey design.

### **Conflicts of Interest**

All authors have completed the ICMJE uniform disclosure form at [www.icmje.org/coi\\_disclosure.pdf](http://www.icmje.org/coi_disclosure.pdf). **Sara Ahmadi-Abhari** declares funding from EIT-health for a brain ageing PhD school programme, and is an unpaid advisor for small-sized chronic care management start-up (Medsien); **Chi Udeh-Momoh** declares: funding from a project grant funding consortia that included Janssen R&D, Gates Foundation, Merck and Takeda, a project grant from RoseTrees Foundation Trust and a project grant from Alzheimers Research UK; funding for a speaking engagement at the Lausanne IX workshop, an engagement at the Meeting of the Minds Neuroscience Conference, and was an invited speaker at the Reserve in Dementia Conference; is a scientific advisor at the Brain and Mind Institute, Aga Khan University, Nairobi; and is an unpaid executive committee member at Biofluids-based Biomarker Professional Interest Area for iSTAART, and a board of trustee member for the British Society for Neuroendocrinology; **Lefkos T. Middleton** reports research funding from Janssen, Novartis, Merck and Takeda, outside the submitted work and had unpaid leadership roles at the Clinical Trials in Alzheimer's Disease (CTAD) executive committee, WW FINGERS, and the European Consortium of Alzheimer's Disease; **Celeste A. de Jager Loots** received a 1-year research contract from the Foundations FINGERS Brain Health Institute, Sweden which contributed to her salary, and receives annual payments from the MCI and B Vitamin project from the University of Oxford, and has

an unpaid advisory role membership at [foodforthebrain.org](http://foodforthebrain.org); **David Salman** is funded by an Imperial College and National Institute of Health Research (NIHR) Biomedical Research Centre (BRC) fellowship, and is an unpaid advisory board member for the Primary Care Rheumatology and Musculoskeletal Medicine society (PCRMM).

## **Licence**

*The Corresponding Author has the right to grant on behalf of all authors and does grant on behalf of all authors, [a worldwide licence](#) to the Publishers and its licensees in perpetuity, in all forms, formats and media (whether known now or created in the future), to i) publish, reproduce, distribute, display and store the Contribution, ii) translate the Contribution into other languages, create adaptations, reprints, include within collections and create summaries, extracts and/or, abstracts of the Contribution, iii) create any other derivative work(s) based on the Contribution, iv) to exploit all subsidiary rights in the Contribution, v) the inclusion of electronic links from the Contribution to third party material where-ever it may be located; and, vi) licence any third party to do any or all of the above.*

## **Abstract**

### Objectives

To quantify the associations between shielding status and loneliness at the start of the COVID-19 pandemic, and physical activity (PA) levels throughout the pandemic.

### Methods

Demographic, health and lifestyle characteristics of 7748 cognitively healthy adults aged >50, and living in London, were surveyed from April 2020 to March 2021. The International Physical Activity Questionnaire (IPAQ) short-form assessed PA before COVID-19 restrictions, and up to 6 times over 11 months. Linear mixed models investigated associations between baseline shielding status, loneliness, and time-varying PA.

### Results

Participants who felt 'often lonely' at the outset of the pandemic completed an average of 522 and 547 fewer Metabolic Equivalent of Task (MET) minutes/week (95% CI: -809, -236,  $p<0.001$ ) (95% CI: -818, -275,  $p<0.001$ ) than those who felt 'never lonely' in univariable and multivariable models adjusted for demographic factors respectively. Those who felt 'sometimes lonely' completed 112 fewer MET minutes/week (95% CI: -219, -5,  $p=0.041$ ) than those who felt 'never lonely' following adjustment for demographic factors.

Participants who were shielding at the outset of the pandemic completed an average of 352 fewer MET minutes/week than those who were not (95% CI: -432, -273;  $p<0.001$ ) in univariable models and 228 fewer MET minutes/week (95% CI: -307, -150,  $p<0.001$ ) following adjustment for demographic factors. No significant associations were found after further adjustment for health and lifestyle factors.

### Conclusions

Those shielding or lonely at pandemic onset were likely to have completed low levels of PA during the pandemic. These associations are influenced by co-morbidities and health status.

## 1.0 Introduction

### Background/ Rationale

Before the COVID-19 pandemic in 2019, between 60-70% of adults over 75 years in the UK were physically inactive, performing less than 30 minutes of moderate intensity physical activity per week (1, 2), and 60-75% were not physically active enough for good health as defined by World Health Organization (WHO) (3) and UK (4) guidelines. In March 2020, restrictions on social interaction were introduced in the UK to slow the transmission of COVID-19 (5). Since then, a range of social restriction measures have been implemented and released (figure 1) (6). Throughout the pandemic those aged 70 years or older or with underlying health conditions defined as ‘clinically extremely vulnerable’, were advised to adhere to more stringent social restrictions, including shielding, where all social contact outside of the household was prohibited (7).

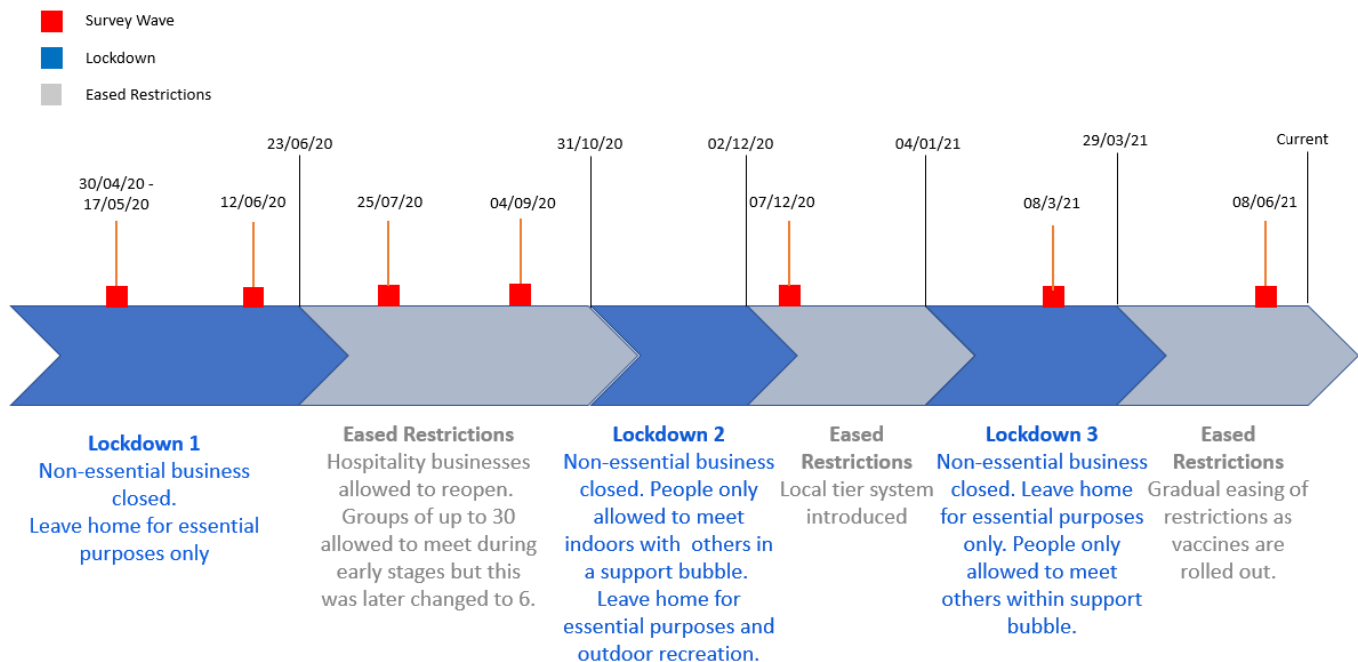

**Figure 1.** A timeline of COVID-19 restrictions in the UK with the survey waves used for the study.

Social restrictions were needed to reduce the spread of the disease but there were concerns that they may have led to reduced physical activity (PA) during the pandemic (8). Social isolation can be associated with reduced physical activity, both for the general population (9-12) and for older adults (13-15). Given the implementation of social restrictions during the pandemic, the imposed social isolation on a significant proportion of the population may have increased their risk of physical inactivity. PA has significant benefits across the spectrum of health (16), preventing cardiovascular disease (17, 18), cancers (19, 20), improving mental health (21-23) and providing other benefits from cognitive to bone health (4). Therefore, those isolated or lonely during the COVID-19 pandemic may be at risk of poor health due to prolonged inactivity (24, 25).

### Objectives

We hypothesised that older adults who were lonely or shielding at the outset of the pandemic would have decreased their levels of PA during the pandemic. To investigate this, we aimed to identify and quantify the associations between i) loneliness and ii) shielding status with PA throughout the course of the pandemic period when the survey was conducted. Thus, we aimed to provide insight into the wider health impacts of the pandemic, and to identify whether targeted PA promotion measures may be needed for particular groups of individuals during and after the pandemic.

## **2.0 Methods**

### 2.1 Study Design

Participants were recruited from the Cognitive Health in Ageing Register of Investigational, Observational and Trial Studies (CHARIOT) (26). The register is made up of over 40,000 cognitively healthy (no diagnosis of dementia) volunteers aged 50 or over, living in Greater London. All members of the CHARIOT register were invited to take part in this CHARIOT Covid-19 Rapid Response (CCRR) study. Of these, 7,748 participants accepted and completed an initial baseline survey. Participants were invited to participate in up to five further surveys at 6-week and 3-month intervals (figure 1). They were able to complete the baseline survey at any

point after receiving the questionnaire invitation. However, they were required to complete follow-up surveys within 10 days of receiving the invite.

The baseline survey contained 122 questions on demographics, diet, alcohol and smoking status, symptoms of COVID-19, functional activities, sleep, frailty, mental health, and PA (Supplementary File 1). PA was assessed using the International Physical Activity Questionnaire short-form (IPAQ) containing seven questions (27). Participants were asked to complete this questionnaire in each of the survey waves, providing an estimate for their weekly activity one week before completing the survey. Additionally, at baseline, participants were also asked to recall their PA habits before the implementation of COVID-19 restrictions in March 2020. Participants were asked how many days they spent completing any vigorous or moderate physical activity or walking in the previous week. They were then asked how much time they usually spend doing each of these activities.

Loneliness was assessed by the question “During the last month, have you experienced loneliness (felt isolated, with no companions)?”. They were given the following options: “never”, “rarely”, “sometimes”, or “often”. Shielding status was assessed by asking participants “Are you currently shielding as per government guidelines for clinically extremely vulnerable groups?”, with options of “Yes” or “No” (Supplementary File 1).

## 2.2 Statistical Methods

All statistical analyses were completed using R software version 4.0.2. lme4 was used to create linear mixed models (28) and lmerTest to perform model validity tests (29). Forest plots were produced with Metafor in R (30).

Body Mass Index (BMI) was calculated by dividing weight in kilograms by height in meters squared. IPAQ data were cleaned in accordance with IPAQ protocol (27). Weekly Metabolic Equivalent of Task (MET) minutes were calculated for each participant at each survey wave, as well as for activity levels before the implementation of restrictions, with 1 MET equivalent to the energy used whilst sitting quietly (31).

Two-level univariable linear mixed models were used, incorporating random intercepts for each participant, to assess the associations between baseline



shielding status, baseline loneliness, and time varying PA. These models assumed equal slopes but allowed for differing baseline (pre-pandemic) PA levels. A theoretical approach was used for confounder selection, aided by construction of two causal diagrams, for each exposure (Supplementary File 2; Figures S2.1 & S2.2). The first multivariable model was adjusted for age, sex, ethnicity, month of survey completion and pre-pandemic PA (Model 1). The second multivariable model was additionally adjusted for BMI and presence or absence of one or more health conditions (Model 2). The third and final multivariable model was additionally adjusted for smoking (yes/no), alcohol consumption (yes/no), whether the participant was living alone (yes no) and whether the participant was single or in a relationship (Model 3). Values of covariates were determined at the time of the baseline survey, and the outcome measure of PA was time-updated at each survey wave.

## 3.0 Results

### 3.1 Participant Characteristics

| Survey                | 1<br>(Baseline,<br>30/4/20) | 2<br>(12/6/20) | 3<br>(25/07/20) | 4<br>(04/09/20) | 5<br>(07/12/20) | 6<br>(08/05/21) |
|-----------------------|-----------------------------|----------------|-----------------|-----------------|-----------------|-----------------|
| Number of completions | 7748                        | 4884           | 4649            | 4725            | 4249            | 4000            |

**Table 1.** Number of participants completing each survey

Of the ~ 40,000 individuals on the CHARIOT register, 7748 consented to take part in the study. Those completing each survey ranged from 7748 (survey wave 1) to 4000 (survey wave 6) (Table 1). Participant characteristics are given in Table 2. Of the 7,748 participants included in the analysis from survey wave 1 (Baseline). 53.1% (4111) of the participants were female and the median age was 70 years, with a lower quartile of 66 years and upper quartile of 75 years. 89% of participants were of white ethnic background, 3.1% were of Asian background, 1.5% were of mixed or multiple ethnic origins, 0.7% were black African, Caribbean, or black British, and 1.1% were of other ethnicities. BMI data were missing for 70.1% of participants. The median BMI was 24.5 kg/m<sup>2</sup>, with an interquartile range of 5.1 kg/m<sup>2</sup>.

Of the population, 3.1% of participants were current smokers and 76.6% drank alcohol on a regular basis. Before restrictions were implemented, PA as measured by median MET minutes for participants was 1836 MET minutes/ week, with an upper quartile of 3252 MET minutes/ week and lower quartile of 816.5 MET minutes/ week.

The majority of participants reported being in a relationship (63.6%). A quarter of participants (26.0%) were shielding at baseline. At baseline 43.8% of participants reported never feeling lonely, 21.4% rarely being lonely, 19.2% sometimes feeling lonely and 6.1% often felt lonely. This question was left unanswered by 9.5% of participants.

| <b>Characteristic</b>                     |                          | <b>N (%)</b> |
|-------------------------------------------|--------------------------|--------------|
| <b>Sex</b>                                | Male                     | 3297 (42.6%) |
|                                           | Female                   | 4111 (53.1%) |
|                                           | Missing                  | 340 (4.4%)   |
| <b>Age (years)</b>                        | 50-59                    | 808 (10.4%)  |
|                                           | 60-69                    | 2592 (33.5%) |
|                                           | 70-79                    | 3553 (45.9%) |
|                                           | 80-89                    | 713 (9.2%)   |
|                                           | 90+                      | 20 (0.3%)    |
|                                           | Missing                  | 62 (0.8%)    |
|                                           | <b>Ethnicity</b>         | White        |
| Asian                                     |                          | 240 (3.1%)   |
| Black African, Caribbean or Black British |                          | 54 (0.7%)    |
| Mixed or Multiple Ethnic Groups           |                          | 120 (1.5%)   |
| Other Ethnic Groups                       |                          | 84 (1.1%)    |
| Missing                                   |                          | 354 (4.6%)   |
| <b>BMI (kg/m<sup>2</sup>)</b>             |                          | <18.5        |
|                                           | 18.5 - 24.9              | 1382 (17.8%) |
|                                           | 25 – 29.9                | 832 (10.7%)  |
|                                           | ≥30                      | 316 (4.1%)   |
|                                           | Missing                  | 5167 (66.7%) |
|                                           | <b>Health Conditions</b> | Present      |
| Absent                                    |                          | 3016 (38.9%) |
| Missing                                   |                          | 320 (4.1%)   |
| <b>Alcohol Drinker</b>                    | Yes                      | 5934 (76.6%) |
|                                           | No                       | 1388 (17.9%) |
|                                           | Missing                  | 426 (5.5%)   |
| <b>Smoker</b>                             | Yes                      | 243 (3.1%)   |
|                                           | No                       | 7072 (91.3%) |

|                                       |                   |              |
|---------------------------------------|-------------------|--------------|
|                                       | Missing           | 433 (5.6%)   |
| <b>Relationship Status</b>            | Single            | 2398 (30.9%) |
|                                       | In a Relationship | 4928 (63.6%) |
|                                       | Missing           | 422 (5.4%)   |
| <b>Loneliness</b>                     | Never             | 3394 (43.8%) |
|                                       | Rarely            | 1660 (21.4%) |
|                                       | Sometimes         | 1484 (19.2%) |
|                                       | Often             | 473 (6.1%)   |
|                                       | Missing           | 737 (9.5%)   |
| <b>Shielding</b>                      | Yes               | 2012 (26.0%) |
|                                       | No                | 5314 (68.6%) |
|                                       | Missing           | 422 (5.4%)   |
| <b>Baseline MET minutes/<br/>week</b> | ≤1000             | 1375 (17.7%) |
|                                       | 1001-1500         | 974 (12.6%)  |
|                                       | 1501-2000         | 628 (8.1%)   |
|                                       | 2001-2500         | 645 (8.3%)   |
|                                       | 2501-3000         | 741 (9.6%)   |
|                                       | 3001-3500         | 446 (5.8%)   |
|                                       | >3500             | 1604 (20.7%) |
|                                       | Missing           | 1335 (17.2%) |

**Table 2.** Characteristics for 7748 participants at baseline;

BMI – Body Mass Index; MET – Metabolic Equivalent of Task

### 3.2 Loneliness and Physical Activity

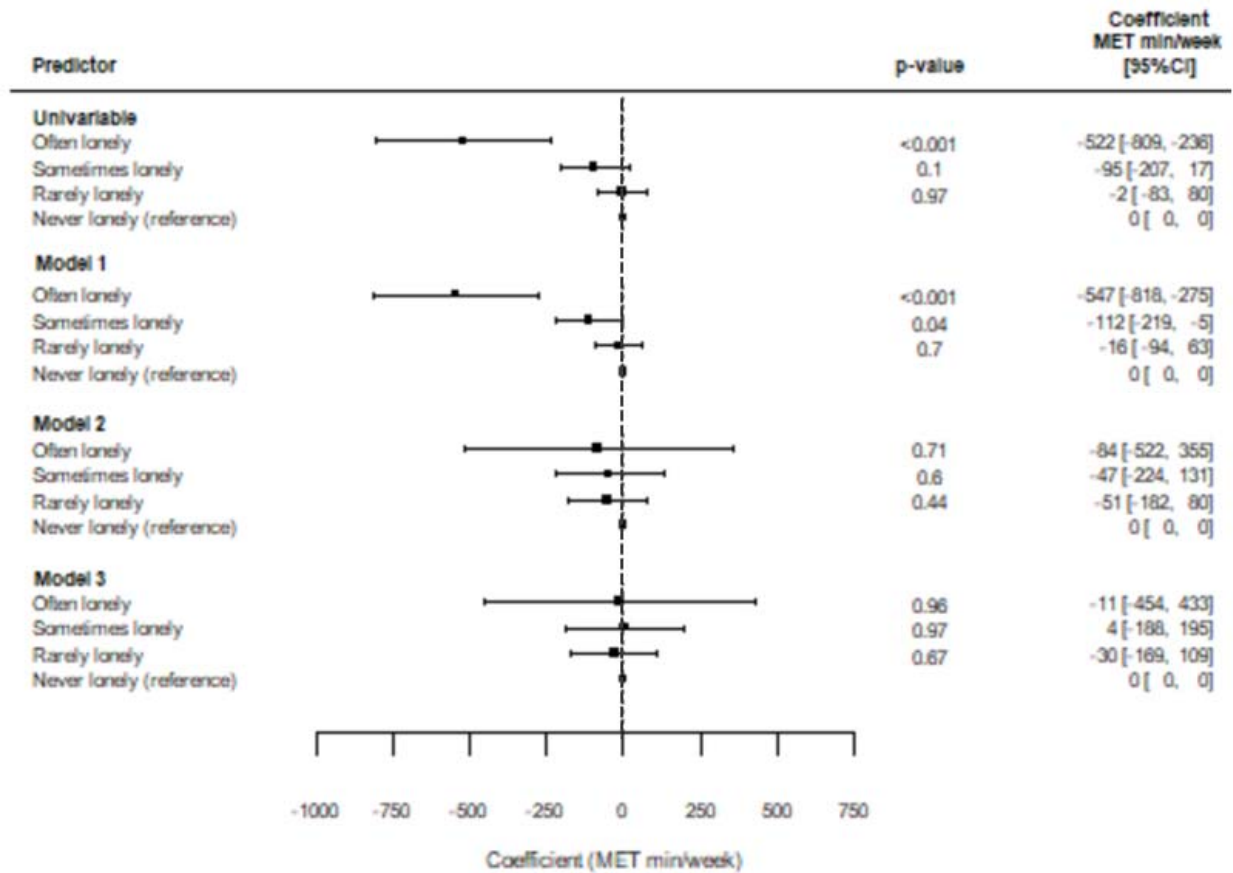

**Figure 2.** Associations between loneliness and change in physical activity for the univariable model, model 1 (adjusted for age, sex, ethnicity, month of survey completion and pre-pandemic Physical Activity - PA), model 2 (adjusted for age, sex, ethnicity, Body Mass Index - BMI, underlying conditions, month of survey completion and pre-pandemic PA) and model 3 (adjusted for age, sex, ethnicity, BMI, underlying conditions, month of survey completion, pre-pandemic PA, for smoking (yes/ no), whether the participant was an alcohol drinker (yes/ no), whether the participant was living alone (yes/ no) and whether the participant was single or in a relationship).

Results for all associations can be found in Supplementary File 3. In univariable linear mixed models, those who were often lonely completed an average of 522 fewer MET minutes/ week than those who were never lonely (95% CI: -809, -236,  $p < 0.001$ ). No significant difference was found between those who were rarely and never lonely in the univariable model (95% CI: -83, 80,  $p < 0.968$ ) (Figure 2).

After adjustment for age, sex, ethnicity, month of survey completion and pre-pandemic PA (model 1) those who were often lonely completed an average of 547 fewer MET min per week than those that were never lonely (95% CI: -818, -275,  $p < 0.001$ ). Those who were sometimes lonely completed an average of 112 fewer MET minutes/ week than those that were never lonely (95% CI: -219, -5,  $p = 0.041$ ).

No significant differences were found between any of the levels of loneliness and never being lonely after additional adjustment for BMI and underlying conditions (model 2) or additionally adjusting for smoking status, alcohol consumption, whether the participant was living alone and whether the participant was single or in a relationship (model 3).

### 3.3 Shielding Status and PA

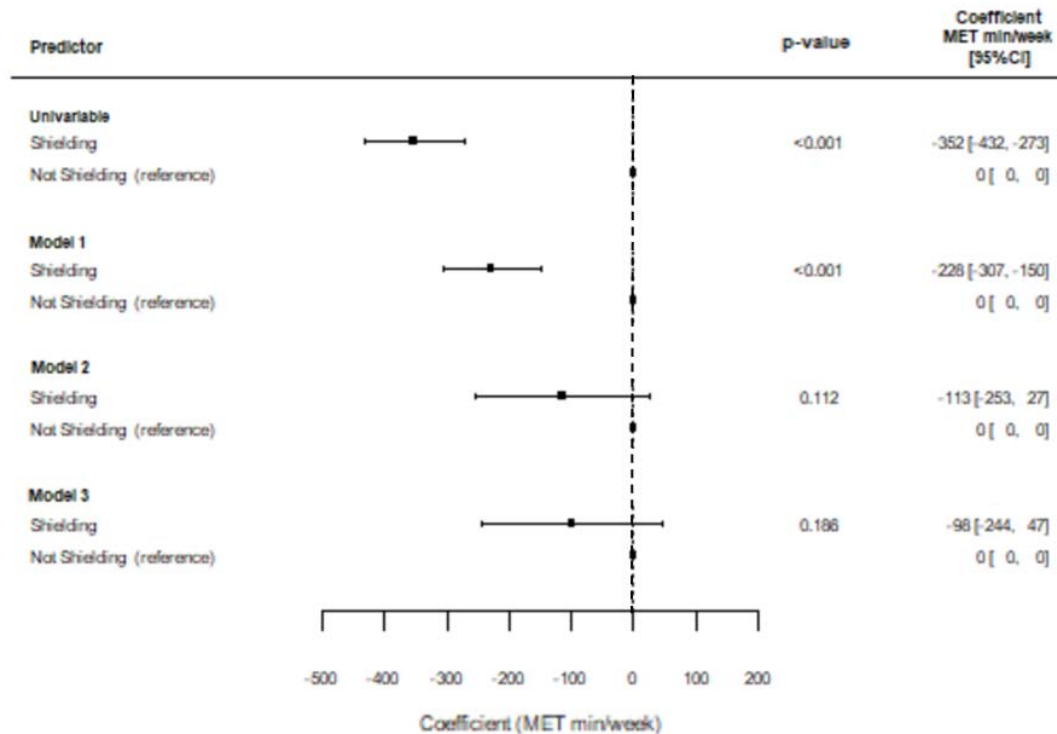

**Figure 3.** Associations between shielding status and change in physical activity for the univariable model, model 1 (adjusted for age, sex, ethnicity, month of survey completion and pre-pandemic Physical Activity - PA), model 2 (adjusted for age, sex, ethnicity, Body Mass Index - BMI, underlying conditions, month of survey completion and pre-pandemic PA) and model 3 (adjusted for age, sex, ethnicity, BMI, underlying conditions (present/ absent), month of survey completion, pre-pandemic PA, for smoking (yes/ no), whether the participant was an alcohol drinker (yes/ no), whether the participant was living alone (yes/ no) and whether the participant was single or in a relationship).

In the univariable model those who were shielding at the onset of COVID-19 restrictions were found to complete an average of 352 fewer MET minutes/ week than those who were not (95% CI: -432, -273,  $p < 0.001$ ) (Figure 3).

After adjustment for age, sex, ethnicity, month of survey completion and pre-pandemic PA (model 1) those who were shielding completed an average of 228 fewer MET minutes/ week than those that were not (95% CI: -307, -150,  $p < 0.001$ ).

No significant difference in MET minutes/ week was found between those who were and were not shielding at the onset of COVID-19 restrictions after adjusting for age, sex, ethnicity, BMI, underlying conditions, month of survey completion and pre-pandemic PA (model 2) or after additionally adjusting for smoking status, whether the participant was an alcohol drinker, whether the participant was living alone and whether the participant was single or in a relationship (model 3) (Figure 3).

## **4.0 Discussion**

### **4.1 Key Results**

We assessed the associations between baseline measures of loneliness and shielding status, with time-varying PA across the COVID-19 pandemic in adults from the CHARIOT cohort aged 50 years or over enrolled in the CCRR study. CCRR Study participants who were “often lonely” and those who were shielding at the onset of COVID-19 were significantly less physically active during the pandemic than those who were never lonely or not shielding. However, after adjustment for health and lifestyle factors, there was no significant association between loneliness or shielding status with PA.

### **4.2 Social Isolation, Loneliness and PA**

Those who were “often lonely” at the onset of COVID-19 restrictions completed significantly less PA week over the 11-month period than those who were never lonely. Similarly, those who were shielding completed significantly less PA than those who were not shielding. This aligns with previous evidence finding subjective and objective reductions in PA in those who are socially isolated or lonely (32, 33). However, after further adjustment for health, lifestyle and relationship factors, including BMI, the presence of health conditions and living/relationship status, associations between PA and loneliness/shielding were no longer significant,

indicating a confounding effect of these factors. This is possible as those of poorer health are likely to have been required to shield or isolate and complete lower levels of PA.

The mechanism for associations between social isolation or loneliness, and reduced PA is complex, and are likely related to the protective effect that social relationships have on health. For example, in a study of UK Biobank participants, negative health behaviours were a significant contributor to excess mortality in those who were socially isolated or lonely (34). The relationship with physical activity might be due, in part, to the absence of motivation from external contacts (11), and reduced availability of social opportunities, and reduced capacity, for PA. Loneliness is independently associated with reduced physical function (35). These factors provide insights, and potential avenues for future interventions, in accordance with models of behaviour change (36) addressing motivation, opportunity and capability, respectively.

People who are socially isolated or lonely are likely to have other co-existing risk factors for lower PA. In a study of objective PA in the English Longitudinal Study of Ageing (ELSA), although social isolation was strongly associated with reduced PA and increased sedentary time in adults over 50 years of age even after adjustment for covariates, the association of loneliness with reduced PA was only present in univariable models (13). Social isolation (an objective measure of social contacts) and loneliness (the subjective feeling of the difference between preferred and actual social contact) encapsulate different (37), but overlapping, concepts. For PA, social connectedness may be a key driver, rather than the subjective perception of social contact alone.

Individuals who were often lonely or shielding at the outset of the pandemic may be at risk of poor health due to prolonged physical inactivity. These individuals may also be at risk of poor health due to other health consequences of loneliness and social isolation, such as poor mental health, cognitive impairment, and impaired motor function (38). Studies have also identified associations between marital status, time alone, and mental or physical health and loneliness among older adults (39). It is therefore possible that loneliness frequency increased during the pandemic due to reduced social contact, poorer physical health due to inactivity and poorer mental



health due to the stress of the pandemic. Therefore, the negative health consequences of the pandemic will have longer term effects and impact beyond direct morbidity and mortality attributable to COVID-19.

#### 4.3 Limitations

There are a number of limitations that may affect the generalisability of these results. First, although the IPAQ short-form is well validated across diverse populations under the age of 65 (40) and adequately validated in participants over this age (41) , there may be bias in self-reported PA. Findings have shown that self-reporting tools only weakly correlate with objective measures such as pedometers (42-44). Therefore, there may be some inaccuracy in the recording of PA. Even so, this should have minimal effect on the findings as changes in PA are measured, rather than absolute levels of PA.

The questionnaire used a question on loneliness modified from the Imperial College Sleep Quality Questionnaire; which in turn was adapted from the Pittsburgh Sleep Quality Index (45) and Centre for Epidemiologic Studies of Depression Scale for work- free periods (46). However, the Office for National Statistics (ONS) suggested measures of the first three questions from the University of California, Los Angeles (UCLA) three-item loneliness scale, together with a direct question about loneliness from the Community Life Survey, which may add more validity or sensitivity to these measures (47). Moreover, the different categories used for loneliness are subjectively defined by the participant, potentially leading to instances where two individuals experiencing the same degree of loneliness may record two different answers. However, these limitations are largely due to the fact loneliness is subjective, and cannot be objectively captured, making these issues largely unavoidable.

Third, there is a risk of recall bias within the study, as at baseline participants were asked to recall their PA habits before the implementation of restrictions. This may have been over- or under-estimated. Fourth, the criteria for shielding changed throughout the pandemic (48). Therefore, the effect of shielding on PA may vary between different risk groups. This makes the clinical meaning of the shielding results difficult to interpret. Finally, 89.0% of participants were white, whereas, in the 2011 census only 44.9% of London's population is white (49). Therefore, it is unlikely



the study participants are a true representation of London's population. Additionally, and perhaps related to this, the participants within the study were more active than expected. Over 90% of participants achieved the WHO's (3) recommended guidelines for PA pre-pandemic. This is significantly more than the 65% of London's population known to meet the recommended guidelines (50).

#### 4.4 Conclusions

Participants who reported feeling often lonely or were shielding at the outset of the pandemic were found to be significantly less physically active during the 11-month study period compared to those who were never lonely or not shielding. Although these relationships were partially explained by other factors such as BMI, underlying conditions, and relationship status, the results indicate that people who were lonely or shielding may be at risk of poor health due to prolonged physical inactivity. Our findings highlight the need for proactive support for those experiencing loneliness or those shielding during the pandemic. Findings from this study also illustrate the need to support members of society who are socially isolated, or at high risk of loneliness outside of the context of the pandemic. Social isolation and loneliness should be considered in the design and implementation of physical activity interventions, and vice-versa, for these groups.

## References

1. Digital N. Health Survey for England 2016 Physical activity in adults 2017 [cited 2021 16/11/2021]. Available from: <https://files.digital.nhs.uk/publication/m/3/hse16-adult-phy-act.pdf>.
2. Sport England. Active Lives Adult Survey November 2018/19 Report 2020 [cited 2021 16/11/2021]. Available from: [https://sportengland-production-files.s3.eu-west-2.amazonaws.com/s3fs-public/2020-04/ActiveLivesAdultNovember18-19Report..pdf?BhkAy2K28pd9bDEz\\_NuisHl2ppuqJtpZ](https://sportengland-production-files.s3.eu-west-2.amazonaws.com/s3fs-public/2020-04/ActiveLivesAdultNovember18-19Report..pdf?BhkAy2K28pd9bDEz_NuisHl2ppuqJtpZ).
3. WHO. WHO guidelines on physical activity and sedentary behaviour. file:///C:/Users/cjgre/Downloads/9789240015128-eng%20(1).pdf: WHO; 2020.
4. Davies SC AF, McBride M, Calderwood C. UK Chief Medical Officers' Physical Activity Guidelines. [https://assets.publishing.service.gov.uk/government/uploads/system/uploads/attachment\\_data/file/832868/uk-chief-medical-officers-physical-activity-guidelines.pdf](https://assets.publishing.service.gov.uk/government/uploads/system/uploads/attachment_data/file/832868/uk-chief-medical-officers-physical-activity-guidelines.pdf): Department of Health and Social Care; 2019.
5. GOV.UK. Prime Minister's statement on coronavirus (COVID-19): 23 March 2020 <https://www.gov.uk/government/speeches/pm-address-to-the-nation-on-coronavirus-23-march-2020>: GOV.UK; 2020 [11/06/2021].

6. GOV.UK. COVID-19 Response - Spring 2021 (Summary) <https://www.gov.uk/government/publications/covid-19-response-spring-2021/covid-19-response-spring-2021-summary>: GOV.UK; 2021 [11/06/2021].
7. GOV. COVID-19: guidance on protecting people defined on medical grounds as extremely vulnerable 2020 [cited 2021 16/11/2021]. Available from: <https://www.gov.uk/government/publications/guidance-on-shielding-and-protecting-extremely-vulnerable-persons-from-covid-19>.
8. Wu B. Social isolation and loneliness among older adults in the context of COVID-19: a global challenge. *Global Health Research and Policy*. 2020;5(1):27.
9. Pels F, Kleinert J. Loneliness and physical activity: A systematic review. *International Review of Sport and Exercise Psychology*. 2016;9(1):231-60.
10. Hawkey L, Thisted, Ronald, Cacioppo, John. Loneliness Predicts Reduced Physical Activity: Cross-Sectional & Longitudinal Analyses. *Health Psychology*. 2009;28:354-63.
11. Berkman LF, Glass T, Brissette I, Seeman TE. From social integration to health: Durkheim in the new millennium. *Soc Sci Med*. 2000;51(6):843-57.
12. Delerue Matos A, Barbosa F, Cunha C, Voss G, Correia F. Social isolation, physical inactivity and inadequate diet among European middle-aged and older adults. *BMC Public Health*. 2021;21(1).
13. Schrepft S, Jackowska M, Hamer M, Steptoe A. Associations between social isolation, loneliness, and objective physical activity in older men and women. *BMC Public Health*. 2019;19(1).
14. Reed SB, Crespo CJ, Harvey W, Andersen RE. Social isolation and physical inactivity in older US adults: Results from the Third National Health and Nutrition Examination Survey. *European Journal of Sport Science*. 2011;11(5):347-53.
15. Robins LM, Hill KD, Finch CF, Clemson L, Haines T. The association between physical activity and social isolation in community-dwelling older adults. *Aging Ment Health*. 2018;22(2):175-82.
16. Posadzki P, Pieper D, Bajpai R, Makaruk H, Könsgen N, Neuhaus AL, et al. Exercise/physical activity and health outcomes: an overview of Cochrane systematic reviews. *BMC Public Health*. 2020;20(1):1724.
17. Devereux GR, Wiles JD, Howden R. Immediate post-isometric exercise cardiovascular responses are associated with training-induced resting systolic blood pressure reductions. *Eur J Appl Physiol*. 2015;115(2):327-33.
18. Hegde SM, Solomon SD. Influence of Physical Activity on Hypertension and Cardiac Structure and Function. *Curr Hypertens Rep*. 2015;17(10):77-.
19. Kohler LN, Garcia DO, Harris RB, Oren E, Roe DJ, Jacobs ET. Adherence to Diet and Physical Activity Cancer Prevention Guidelines and Cancer Outcomes: A Systematic Review. *Cancer Epidemiology Biomarkers & Prevention*. 2016;25(7):1018-28.
20. Rezende LFM, Sá TH, Markozannes G, Rey-López JP, Lee IM, Tsilidis KK, et al. Physical activity and cancer: an umbrella review of the literature including 22 major anatomical sites and 770 000 cancer cases. *Br J Sports Med*. 2018;52(13):826-33.
21. Stanton R, Happell B, Reaburn P. The mental health benefits of regular physical activity, and its role in preventing future depressive illness. *Nursing: Research and Reviews*. 2014:45.
22. Jacob L, Tully MA, Barnett Y, Lopez-Sanchez GF, Butler L, Schuch F, et al. The relationship between physical activity and mental health in a sample of the UK public: A cross-sectional study during the implementation of COVID-19 social distancing measures. *Ment Health Phys Act*. 2020;19:100345.
23. Chekroud SR, Gueorguieva R, Zheutlin AB, Paulus M, Krumholz HM, Krystal JH, et al. Association between physical exercise and mental health in 1.2 million individuals in the USA between 2011 and 2015: a cross-sectional study. *Lancet Psychiatry*. 2018;5(9):739-46.
24. Galper DI, Trivedi MH, Barlow CE, Dunn AL, Kampert JB. Inverse association between physical inactivity and mental health in men and women. *Med Sci Sports Exerc*. 2006;38(1):173-8.
25. Gaetano A. Relationship between physical inactivity and effects on individual health status. 2016;16:1069-74.

26. Imperial College London. The CHARIOT: Cognitive Health in Ageing Register Investigational, Observational and Trial Studies <https://www.imperial.ac.uk/school-public-health/ageing/get-involved/2021> [cited 2021 29/06/2021]. Available from: <https://www.imperial.ac.uk/school-public-health/ageing/get-involved/>.
27. Questionnaire IPA. IPAQ scoring protocol <https://sites.google.com/site/theipaq/scoring-protocol2020> [cited 2021 29/07/2021]. Available from: <https://sites.google.com/site/theipaq/scoring-protocol>.
28. CRAN. lme4: Linear Mixed-Effects Models using 'Eigen' and S4 <https://cran.r-project.org/web/packages/lme4/index.html2021> [cited 2021 14/08/2021]. Available from: <https://cran.r-project.org/web/packages/lme4/index.html>.
29. CRAN. lmerTest: Tests in Linear Mixed Effects Models <https://cran.r-project.org/web/packages/lmerTest/index.html2021> [cited 2021 14/08/2021]. Available from: <https://cran.r-project.org/web/packages/lmerTest/index.html>.
30. Metafor. The metafor Package: A Meta-Analysis Package for R 2021 [Available from: <https://www.metafor-project.org/doku.php/metafor>].
31. Chan H. Staying Active <https://www.hsph.harvard.edu/nutritionsource/staying-active/2021> [cited 2021 29/07/2021]. Available from: <https://www.hsph.harvard.edu/nutritionsource/staying-active/>.
32. Kobayashi LC, Steptoe A. Social Isolation, Loneliness, and Health Behaviors at Older Ages: Longitudinal Cohort Study. *Ann Behav Med*. 2018;52(7):582-93.
33. Schrepft S, Jackowska M, Hamer M, Steptoe A. Associations between social isolation, loneliness, and objective physical activity in older men and women. *BMC Public Health*. 2019;19(1):74.
34. Elovainio M, Hakulinen C, Pulkki-Råback L, Virtanen M, Josefsson K, Jokela M, et al. Contribution of risk factors to excess mortality in isolated and lonely individuals: an analysis of data from the UK Biobank cohort study. *Lancet Public Health*. 2017;2(6):e260-e6.
35. Philip KEJ, Polkey MI, Hopkinson NS, Steptoe A, Fancourt D. Social isolation, loneliness and physical performance in older-adults: fixed effects analyses of a cohort study. *Sci Rep*. 2020;10(1).
36. Michie S, van Stralen MM, West R. The behaviour change wheel: A new method for characterising and designing behaviour change interventions. *Implementation Science*. 2011;6(1):42.
37. Ong AD, Uchino BN, Wethington E. Loneliness and Health in Older Adults: A Mini-Review and Synthesis. *Gerontology*. 2016;62(4):443-9.
38. Lee EE, Depp C, Palmer BW, Glorioso D, Daly R, Liu J, et al. High prevalence and adverse health effects of loneliness in community-dwelling adults across the lifespan: role of wisdom as a protective factor. *Int Psychogeriatr*. 2019;31(10):1447-62.
39. Victor CR, Scambler SJ, Bowling A, Bond J. The prevalence of, and risk factors for, loneliness in later life: a survey of older people in Great Britain. *Ageing and Society*. 2005;25(6):357-75.
40. Craig CL, Marshall AL, Sjöström M, Bauman AE, Booth ML, Ainsworth BE, et al. International physical activity questionnaire: 12-country reliability and validity. *Med Sci Sports Exerc*. 2003;35(8):1381-95.
41. Tomioka K, Iwamoto J, Saeki K, Okamoto N. Reliability and Validity of the International Physical Activity Questionnaire (IPAQ) in Elderly Adults: The Fujiwara-kyo Study. *J Epidemiol*. 2011;21(6):459-65.
42. Prince SA, Adamo KB, Hamel M, Hardt J, Connor Gorber S, Tremblay M. A comparison of direct versus self-report measures for assessing physical activity in adults: a systematic review. *International Journal of Behavioral Nutrition and Physical Activity*. 2008;5(1):56.
43. Lee PH, Macfarlane DJ, Lam T, Stewart SM. Validity of the international physical activity questionnaire short form (IPAQ-SF): A systematic review. *International Journal of Behavioral Nutrition and Physical Activity*. 2011;8(1):115.

44. Cleland C, Ferguson S, Ellis G, Hunter RF. Validity of the International Physical Activity Questionnaire (IPAQ) for assessing moderate-to-vigorous physical activity and sedentary behaviour of older adults in the United Kingdom. *BMC Med Res Methodol*. 2018;18(1).
45. Buysse DJ, Reynolds CF, 3rd, Monk TH, Berman SR, Kupfer DJ. The Pittsburgh Sleep Quality Index: a new instrument for psychiatric practice and research. *Psychiatry Res*. 1989;28(2):193-213.
46. Radloff LS. The CES-D Scale: A Self-Report Depression Scale for Research in the General Population. *Appl Psychol Meas*. 1977;1(3):385-401.
47. Office for National Statistics. Measuring loneliness: guidance for use of the national indicators on surveys 2018 [Available from: <https://www.ons.gov.uk/peoplepopulationandcommunity/wellbeing/methodologies/measuringlonelinessguidanceforuseofthenationalindicatorsonsurveys#recommended-measures-for-adults>].
48. NHS Digital. NHSD Shielded Patient List Criteria 2022 [26/03/2022]. Available from: <https://digital.nhs.uk/coronavirus/shielded-patient-list/risk-criteria>.
49. GOV. Regional ethnic diversity <https://www.ethnicity-facts-figures.service.gov.uk/uk-population-by-ethnicity/national-and-regional-populations/regional-ethnic-diversity/latest2018> [cited 2021 04/08/2021]. Available from: <https://www.ethnicity-facts-figures.service.gov.uk/uk-population-by-ethnicity/national-and-regional-populations/regional-ethnic-diversity/latest>.
50. Public Health England. Physical Activity <https://fingertips.phe.org.uk/profile/physical-activity/data#page/0>: Public Health England; 2020 [14/06/2021].
